# Supplementary material for: International impact of large multi-centre surgical trials of arthroscopic subacromial decompression
Source: bioRxiv or medRxiv preprint supplement (doi:10.1101/2021.11.10.21266128), 2021-11-12
Supplement: Supplementary file [file media-1.pdf]

## Supplementary material

Table 1: Characterisation of patients undergoing ASAD in Belgium (IQVIA LPD Belgium), UK (CPRD) and US (IQVIA OpenClaims), data

| Year                               | Age (SD)      | Gender (% female) | Charlson index (SD) | Medicines previous month (IQR) | Cases  |
|------------------------------------|---------------|-------------------|---------------------|--------------------------------|--------|
| <b>Belgium (IQVIA LPD Belgium)</b> |               |                   |                     |                                |        |
| 2011                               | 58.44 (17.60) | 44.44             | 1.11 (2.38)         | 6 (3-7)                        | 9      |
| 2012                               | 61.30 (15.05) | 40.00             | 0.70 (1.16)         | 4 (2-6)                        | 17     |
| 2013                               | 52.77 (12.54) | 61.54             | 0.77 (1.02)         | 3 (2-7)                        | 24     |
| 2014                               | 57.70 (15.45) | 50.00             | 1.17 (1.94)         | 3 (1-6)                        | 36     |
| 2015                               | 59.23 (12.69) | 67.50             | 0.88 (1.42)         | 4 (1-5)                        | 27     |
| 2016                               | 55.95 (12.63) | 59.65             | 0.74 (1.44)         | 3 (1-5)                        | 45     |
| 2017                               | 59.60 (13.75) | 53.49             | 0.70 (0.77)         | 4 (1-7)                        | 32     |
| 2018                               | 60.46 (12.98) | 61.54             | 0.62 (0.44)         | 5 (2-8)                        | 22     |
| 2019                               | 60.68 (14.36) | 64.00             | 1.16 (2.46)         | 3 (1-6)                        | 21     |
| <b>UK (CPRD)</b>                   |               |                   |                     |                                |        |
| 2005                               | 55.41 (11.94) | 49.82             | 0.53 (1.12)         | 2 (0-5)                        | 761    |
| 2006                               | 55.02 (12.34) | 47.86             | 0.51 (0.94)         | 2 (0-5)                        | 948    |
| 2007                               | 54.83 (11.98) | 49.06             | 0.65 (1.08)         | 2 (0-5)                        | 1155   |
| 2008                               | 55.33 (12.49) | 50.50             | 0.72 (1.24)         | 2 (0-5)                        | 1413   |
| 2009                               | 55.12 (12.50) | 49.15             | 0.68 (1.12)         | 2 (0-6)                        | 1596   |
| 2010                               | 54.80 (12.05) | 49.72             | 0.72 (1.23)         | 2 (0-5)                        | 1651   |
| 2011                               | 55.55 (12.03) | 48.70             | 0.74 (1.21)         | 3 (0-6)                        | 1709   |
| 2012                               | 55.73 (11.91) | 50.00             | 0.73 (1.14)         | 3 (0-6)                        | 1687   |
| 2013                               | 55.15 (12.18) | 50.92             | 0.76 (1.20)         | 3 (0-6)                        | 1581   |
| 2014                               | 55.46 (11.52) | 49.12             | 0.75 (1.12)         | 3 (1-6)                        | 1485   |
| 2015                               | 55.72 (12.02) | 50.28             | 0.75 (1.26)         | 3 (0-6)                        | 1150   |
| 2016                               | 55.04 (11.61) | 47.89             | 0.80 (1.27)         | 2 (0-5)                        | 871    |
| 2017                               | 55.07 (11.44) | 49.86             | 0.71 (1.18)         | 3 (1-5)                        | 649    |
| 2018                               | 56.33 (11.04) | 50.37             | 0.81 (1.25)         | 3 (1-6)                        | 501    |
| 2019                               | 55.39 (11.04) | 49.61             | 0.76 (1.21)         | 3 (1-6)                        | 361    |
| <b>US (IQVIA OpenClaims)</b>       |               |                   |                     |                                |        |
| 2005                               | 54.83 (11.96) | 48.19             | 0.57 (1.25)         | 0 (0-0)                        | 42465  |
| 2006                               | 55.06 (12.08) | 47.78             | 0.62 (1.27)         | 0 (0-0)                        | 49418  |
| 2007                               | 55.39 (12.25) | 46.74             | 0.67 (1.32)         | 0 (0-0)                        | 58170  |
| 2008                               | 55.74 (12.41) | 46.73             | 0.73 (1.40)         | 0 (0-0)                        | 71444  |
| 2009                               | 55.58 (12.42) | 46.35             | 0.82 (1.43)         | 0 (0-0)                        | 114409 |
| 2010                               | 55.80 (12.45) | 45.99             | 0.94 (1.55)         | 3 (0-6)                        | 139231 |
| 2011                               | 56.07 (12.53) | 45.51             | 1.02 (1.63)         | 4 (1-7)                        | 143463 |
| 2012                               | 56.41 (12.65) | 45.52             | 1.11 (1.67)         | 4 (2-7)                        | 141712 |
| 2013                               | 56.14 (12.58) | 45.11             | 1.15 (1.73)         | 5 (3-9)                        | 182021 |
| 2014                               | 56.12 (12.47) | 44.53             | 1.23 (1.82)         | 6 (3-11)                       | 204645 |
| 2015                               | 56.22 (12.42) | 44.68             | 1.36 (1.90)         | 7 (3-11)                       | 209402 |
| 2016                               | 56.48 (12.34) | 45.20             | 1.49 (2.03)         | 7 (3-12)                       | 212048 |
| 2017                               | 56.83 (12.21) | 45.27             | 1.60 (2.11)         | 7 (3-12)                       | 204810 |
| 2018                               | 57.21 (12.22) | 45.58             | 1.71 (2.18)         | 7 (3-12)                       | 199974 |
| 2019                               | 57.50 (12.17) | 45.25             | 1.77 (2.24)         | 7 (3-12)                       | 187183 |
